# Supplementary material
Source: PubMed Central journal article supplement (PMC4558661)
Supplement: supp_tpc.114.134809_tpc134809_SupplementalData.pdf [file supp_tpc.114.134809_tpc134809_SupplementalData.pdf]

**Supplemental Data**

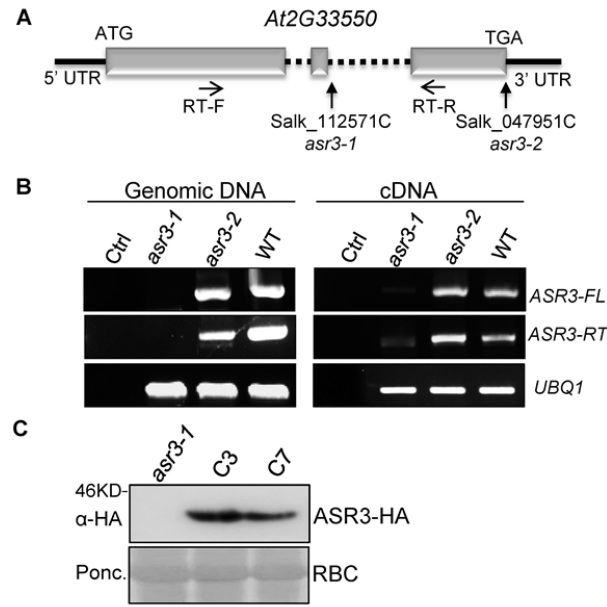

**Supplemental Figure 1: Characterization of *asr3* T-DNA knockout lines and complementation transgenic lines.**

(A) The scheme of *At2G33550* (*ASR3*) with gray boxes indicating exons and dash lines representing introns. The T-DNA insertions are indicated by arrows for two Salk lines. The positions of RT-PCR primers are labeled with arrows. (B) Genotyping and RT-PCR detection of *ASR3* expression in Salk lines. PCR was carried out with genomic DNA or cDNA using either the full-length or RT-PCR primers as indicated above. *UBQ1* was used as an internal control. Ctrl is H<sub>2</sub>O. (C) Immunoblot analysis of *ASR3*-HA proteins in two independent transgenic lines (C3 and C7) of *pASR3:ASR3-HA* in the *asr3-1* mutant background. Ponceau staining (Ponc.) of RuBisCo proteins (RBC) serves as a loading control.

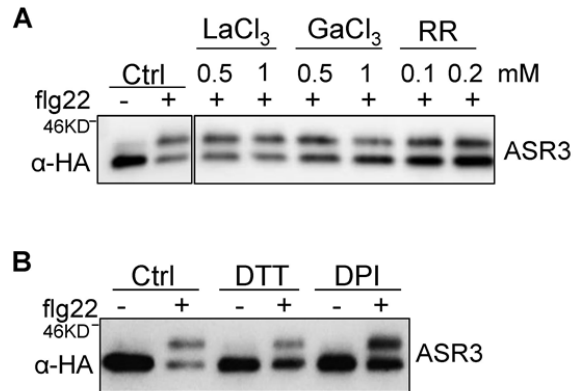

**Supplemental Figure 2. The flg22-induced ASR3 phosphorylation is not affected by Ca<sup>2+</sup> channel inhibitor or NADPH oxidase inhibitor treatment.**

(A) flg22-induced ASR3 mobility shift is not affected by Ca<sup>2+</sup> channel inhibitor treatment. Inhibitors LaCl<sub>3</sub>, GaCl<sub>3</sub> and ruthenium red (RR) were added to protoplasts expressing ASR3-HA 30 min before flg22 treatment. (B) flg22-induced ASR3 mobility shift is not affected by NADPH oxidase inhibitor diphenylene iodonium (DPI) or redox reagent Dithiothreitol (DTT). Similar results were obtained from two independent biological repeats.

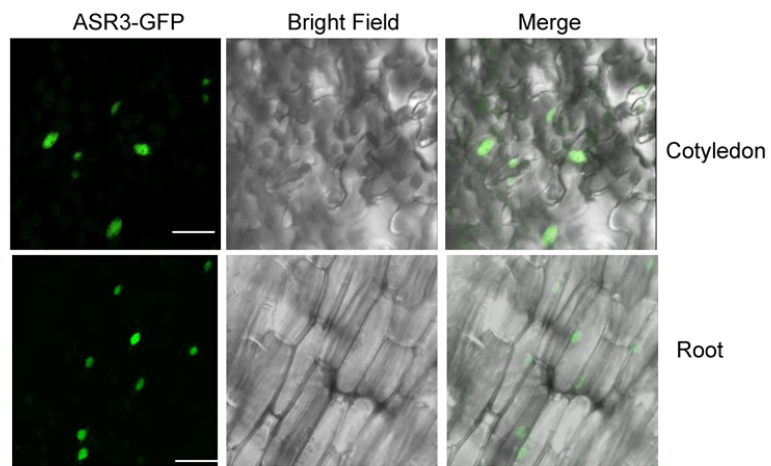

**Supplemental Figure 3. ASR3 localizes to nucleus in *35S:ASR3-GFP* transgenic plants.**

Four-day-old seedlings were subjected to confocal microscopic examination. Scale bar is equivalent to 20  $\mu\text{m}$ .

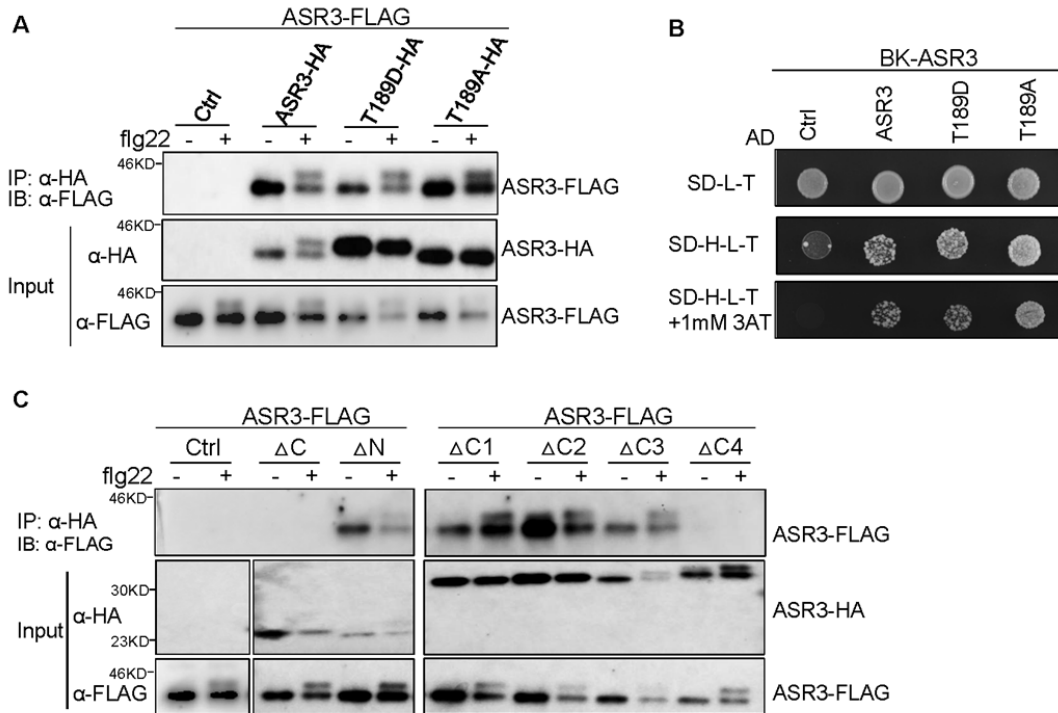

**Supplemental Figure 4. The coiled-coil domain of ASR3 is required for ASR3 homo-dimerization.**

(A) Dimerization of ASR3 with WT ASR3, phospho-inactive ASR3<sup>T189A</sup> or phospho-mimetic ASR3<sup>T189D</sup> by co-IP assay. Protoplasts co-transfected with ASR3-FLAG and Ctrl or HA-tagged ASR3 and phosphorylation variants were incubated for 10 h and treated with or without 100 nM flg22 for 30 min. (B) Interaction of ASR3 with itself or the phosphorylation variants in yeast two-hybrid assay. Yeast colonies carrying pGBKT7-ASR3 and pGADT7 empty vector (Ctrl), pGADT7-ASR3, pGADT7-ASR3<sup>T189A</sup> or pGADT7-ASR3<sup>T189D</sup> were grown on the indicated SD medium. (C) Identification of ASR3 dimerization domain. Different truncation or deletion mutants tagged with HA were co-expressed with ASR3-FLAG in protoplasts for 12 h and followed by 100 nM flg22 treatment for 15 min.

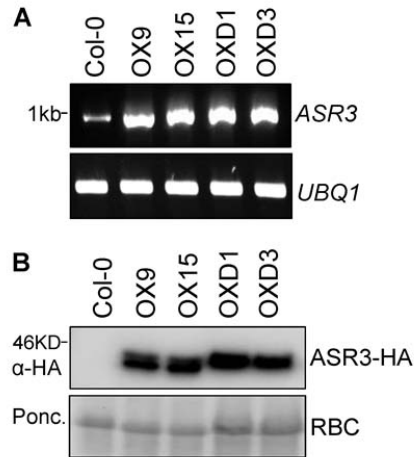

**Supplemental Figure 5. Characterization of *35S:ASR3-HA* and *35S:ASR3<sup>T189D</sup>-HA* transgenic lines.**

(A) RT-PCR detection of *ASR3* gene expression in Col-0 WT and *ASR3* transgenic plants. OX9 and OX15 are two representative lines for *35S:ASR3-HA*, and OXD1 and OXD3 are two representative lines for *35S:ASR3<sup>T189D</sup>-HA*. *UBQ1* was used as an internal control. (B) *ASR3* protein expression in transgenic lines detected by immunoblotting with  $\alpha$ -HA antibody. Ponceau staining (Ponc.) of RBC serves as a loading control.

**Supplemental Table 1. LC-MS/MS analysis of in vivo phosphorylation of ASR3 upon flg22 treatment.**

| Peptide <sup>a</sup>          | Identified residue | Mr (expt) <sup>b</sup> | Mr (calc) <sup>c</sup> | Expect <sup>d</sup> | Ion <sup>e</sup> Score | Freq. <sup>f</sup> |
|-------------------------------|--------------------|------------------------|------------------------|---------------------|------------------------|--------------------|
| 1-M.ALEQLGLGVpSAVDGGE-17      | S11                | 2994.3148              | 2994.3092              | 0.0027              | 42                     | 1                  |
| 180-R.EpSPEKLNSTPVAK.S-194    | S182               | 1478.7034              | 1478.7018              | 0.36                | 23                     | 1                  |
| 180-R.ESPEKLNpSTPVAK.S-194    | S188               | 1478.7032              | 1478.7018              | 0.25                | 18                     | 2                  |
| 185-K.LNSpTPVAK.S-194         | T189               | 908.4194               | 908.4368               | 0.03                | 50                     | 7                  |
| 180-R.ESPEKLNspTPVAK.S-194    | T189               | 1478.709               | 1478.7018              | 0.0014              | 50                     | 6                  |
| 217-K.QPEAANVEGGSTpSQEE.R-234 | S230               | 1867.765               | 1867.7585              | 4.70E-05            | 58                     | 3                  |

<sup>a</sup> The number before and after the peptide indicates the position of detected peptide in the ASR3 protein sequence. Phosphorylated residues are denoted as pS and pT.

<sup>b</sup> Experimental m/z transformed to a relative molecular mass.

<sup>c</sup> Relative molecular mass calculated from the matched peptide sequence.

<sup>d</sup> Frequency this match would occur by chance, confident matches typically have Expect values <0.05.

<sup>e</sup> Individual ions scores > 45 indicate identity or extensive homology (p<0.05).

<sup>f</sup> The number of peptide matches to the same peptide sequence with the same modifications and charge.

**Supplemental Table 2. Primers used in this study.****Cloning and mutation primers**

| Gene                             | Forward primer                                    | Reverse primer                                    |
|----------------------------------|---------------------------------------------------|---------------------------------------------------|
| <i>ASR3</i>                      | CGGGATCCATGGCTCTGGAACAGTT<br>AGG                  | GAAGGCCTCATCTTATCCGCGATTT<br>TTG                  |
| <i>ProASR3</i>                   | CCGCTCGAGGAGCTCCAATCCTTAT<br>ATGATTTGTTTCTCC      | CGGGATCCTCAAACGGAATATTCCT<br>TCC                  |
| <i>ASR3<math>\Delta</math>C</i>  | CGGGATCCATGGCTCTGGAACAGTT<br>AGG                  | GAAGGCCTAGGAATCACACCACCGT<br>CAAC                 |
| <i>ASR3<math>\Delta</math>N</i>  | CGGGATCCATGCCGGCGGTTCCGGT<br>TC                   | GAAGGCCTCATCTTATCCGCGATTT<br>TTG                  |
| <i>ASR3<math>\Delta</math>C1</i> | GACGGTGGTGTGATTC\CTACTCCGG<br>TGGCTAAATCA         | TGATTTAGCCACCGGAGTAG\GAAT<br>CACACCACCGTC         |
| <i>ASR3<math>\Delta</math>C2</i> | CCTGAGAAGTTGAATTCT\GCAAACG<br>TGGAAGGTGGA         | TCCACCTTCCACGTTTGC\AGAATTC<br>AACTTCTCAGG         |
| <i>ASR3<math>\Delta</math>C3</i> | GAGAAACAGCCAGAAGCAAAGA\TG<br>CAGAATCAGTTG         | CAACTGATTCTGCA\TCTTTGCTTCT<br>GGCTGTTTCTC         |
| <i>ASR3<math>\Delta</math>C4</i> | GAAGAAGGAGAAACAA\AGCAAAG<br>AAAAGATCACGGT         | ACCGTGATCTTTTCTTTGCT\TTGTTT<br>CTCCTTCTTC         |
| <i>ASR3<sup>S169A</sup></i>      | GGATTGGCTCCGGCGGCAGACGAGG<br>GATTGTTG             | CAACAATCCCTCGTCIGCCGCCGGA<br>GCCAATCC             |
| <i>ASR3<sup>S175A</sup></i>      | GACGAGGGATTGTTGGCTGATTTAG<br>ATCGGAGA             | TCTCCGATCTAAATCAGCCAACAAT<br>CCCTCGTC             |
| <i>ASR3<sup>S182A</sup></i>      | TTAGATCGGAGAGAAGCTCCTGAGA<br>AGTTGAAT             | ATTCAACTTCTCAGGAGCTTCTCTCC<br>GATCTAA             |
| <i>ASR3<sup>T189A</sup></i>      | GAGAAGTTGAATTCTGCTCCGGTGG<br>CTAAATCA             | TGATTTAGCCACCGGAGCAGAATTC<br>AACTTCTC             |
| <i>ASR3<sup>T189D</sup></i>      | GAGAAGTTGAATTCTGATCCGGTGG<br>CTAAATCA             | TGATTTAGCCACCGGATCAGAATTC<br>AACTTCTC             |
| <i>ASR3<sup>T196A</sup></i>      | GTGGCTAAATCAGTTGCTGATGTTA<br>TAGACAAA             | TTTGTCTATAACATCAGCAACTGAT<br>TTAGCCAC             |
| <i>ASR3<sup>S230A</sup></i>      | GAAGGTGGATCGACAGCAAGAA<br>GAGAGGAAG               | CTTCCTCTTCTTGTGCTGTGCGATC<br>CACCTTC              |
| <i>ASR3-ear-A</i>                | CGGCGGTTCCGGTTGCTTCGGCTGG<br>AGCGGCTCCGGCGTCAGAC  | GTCTGACGCCGGAGCCGCTCCAGCC<br>GAAGCAACCGGAACCGCCGG |
| <i>ASR3-ear-B</i>                | CTTGAGGTTCAGAATGCAAACGCAA<br>AAGCAGACAGAGAGCAAAGA | TCTTTGCTCTGTCTGCTTTTGGCT<br>TTGCATTCTGAACCTCAAG   |

Note: The restriction enzyme sites are underlined and start codon is italicized. For deletion primers, the deletion fragment is indicated by back slash. For point mutation primers, the mutation sites are underlined

**RT-PCR primers**

| Gene        | Forward primer      | Reverse primer      |
|-------------|---------------------|---------------------|
| <i>ASR3</i> | TGTCCGTTACGCTTCCTCT | CCGAAAAGATGGAGCAAT  |
| <i>UBQ1</i> | ACCGCAAGACCATCACTCT | AGGCTCAACTGGTTGCTGT |

**qRT-PCR primers**

| Gene          | Forward primer        | Reverse primer       |
|---------------|-----------------------|----------------------|
| <i>FRK1</i>   | ATCTTCGCTTGGAGCTTCTC  | TGCAGCGCAAGGACTAGAG  |
| <i>WRKY30</i> | GCAGCTTGAGAGCAAAGAATG | AGCCAAATTTCCAAGAGGAT |

|                  |                          |                           |
|------------------|--------------------------|---------------------------|
| <i>At2G17740</i> | TGCTCCATCTCTCTTTGTGC     | ATGCGTTGCTGAAGAAGAGG      |
| <i>At1G07160</i> | CGTGTTGGGGATTGATTCG      | AGAGCTCGGGCGGTTATG        |
| <i>At4G25110</i> | GCTCATCTTAGGCGCTTCTC     | ACAGCAAATGCCTCGTTAGC      |
| <i>At2G40180</i> | GATTGAAGCATTGGGTGGTT     | GGTTTCCGGTTCAGCTATCA      |
| <i>At1G02360</i> | ATTTGACACCGTTTCTGGATTC   | CAACTATCGTGGAACTACAATTACG |
| <i>UBQ10</i>     | AGATCCAGGACAAGGAAGGTATTC | CGCAGGACCAAGTGAAGAGTAG    |

**ChIP-PCR Primers**

| Name | Forward primer            | Reverse primer           |
|------|---------------------------|--------------------------|
| P1   | TTATGCATATAGTTTCATTCGC    | GTCAACGCTTACTCTCATTAAC   |
| P2   | TCACCGTAACACATTGATATTCAAC | TGCTATAACACCACATCACAAATG |
| P3   | TGACTGTATTCCGCATGTGA      | TTCCAACCTGCAATCACTAACC   |
| P4   | TCCTCACTTCCTCTTCCTCG      | ATTTGGAGGAGGACTTGACG     |

**Supplemental Table 3. Elicitors and chemical inhibitors used in this study.**

| Name                                       | Company             | Cat#                     | Concentration |
|--------------------------------------------|---------------------|--------------------------|---------------|
| Flagellin peptide flg22                    | Genscript           | Custom Peptide synthesis | 100 nM        |
| EF-Tu peptide elf18                        | Genscript           | Custom Peptide synthesis | 100 nM        |
| Chitin                                     | Sigma               | C9752                    | 50 µg/mL      |
| Lipopolysaccharide (LPS)                   | Sigma               | L-2012                   | 50 µg/mL      |
| K-252a                                     | A.G. Scientific     | K-1006                   | 1 µM          |
| Diphenylene Iodonium (DPI)                 | A.G. Scientific     | D-1011                   | 5 µM          |
| U0126                                      | A.G. Scientific     | U-1026                   | 5 µM          |
| Lanthanum Chloride (LaCl <sub>3</sub> )    | Sigma               | L4131                    | 0.5-1 mM      |
| Gallium Chloride (GaCl <sub>3</sub> )      | Sigma               | 413089                   | 0.5-1 mM      |
| Ruthenium Red (RR)                         | Sigma               | R2751                    | 0.1-0.2 mM    |
| Calf intestinal alkaline phosphatase (CIP) | New England BioLabs | M0290S                   | 0.5 U/µl      |
| Lamda protein phosphatase (λPP)            | New England BioLabs | P0753S                   | 2 U/µl        |
